# Supplementary material
Source: MDPI journal article supplement (https://www.mdpi.com/2073-4395/11/11/2270)
Supplement: s1 [file s1]

**Table S1.** Definitions and values of parameters used in Equations 1–8 for human health risk calculations.

| Formula parameter for risk assessments |                                             |                                           | Reference value (RfD ) and cancer slope factor (SF) for potentially toxic elements <sup>[1]</sup> |                      |                        |                                   |                                     |
|----------------------------------------|---------------------------------------------|-------------------------------------------|---------------------------------------------------------------------------------------------------|----------------------|------------------------|-----------------------------------|-------------------------------------|
| Parameters                             | Meaning                                     | Value                                     | Potentially toxic element                                                                         | Oral RfD (mg/kg/day) | Dermal RfD (mg/kg/day) | Oral CSF(mg/kg-day) <sup>-1</sup> | Dermal CSF(mg/kg-day) <sup>-1</sup> |
| C <sub>hm</sub>                        | Concentration of potentially toxic elements | mg L <sup>-1</sup>                        | As                                                                                                | 300E-04              | 1.23E-04               | 1.50E+00                          | 3.66E+00                            |
| IngR                                   | Ingestion rate                              | 2.0 L day <sup>-1</sup> <sup>[2]</sup>    |                                                                                                   |                      |                        |                                   |                                     |
| EF                                     | Exposure frequency                          | 350 day year <sup>-1</sup> <sup>[2]</sup> |                                                                                                   |                      |                        |                                   |                                     |
| ED                                     | Exposure duration                           | 70 year <sup>[2]</sup>                    |                                                                                                   |                      |                        |                                   |                                     |
| BW                                     | Body weight                                 | 70 kg <sup>[3]</sup>                      |                                                                                                   |                      |                        |                                   |                                     |
| AT                                     | average life time                           | 25550 days <sup>[2]</sup>                 |                                                                                                   |                      |                        |                                   |                                     |
| SA                                     | Drinking water exposed skin area            | 18,000 cm <sup>2</sup> <sup>[2]</sup>     |                                                                                                   |                      |                        |                                   |                                     |
| K <sub>p</sub>                         | Coefficient for dermal permeability         | 0.001 cm h <sup>-1</sup> <sup>[2]</sup>   |                                                                                                   |                      |                        |                                   |                                     |
| ET                                     | exposure time                               | 0.58 h day <sup>-1</sup> <sup>[2]</sup>   |                                                                                                   |                      |                        |                                   |                                     |
| f <sub>i</sub>                         | Factor for unit conversion                  | L 1000 cm <sup>-1</sup> <sup>[4]</sup>    |                                                                                                   |                      |                        |                                   |                                     |

1. De Miguel, E.; Iribarren, I.; Chacón, E.; Ordoñez, A.; Charlesworth, S. Risk-based evaluation of the exposure of children to trace elements in playgrounds in Madrid (Spain). *Chemosphere* **2007**, *66*, 505-513, doi:<https://doi.org/10.1016/j.chemosphere.2006.05.065>.
2. Xiao, J.; Wang, L.; Deng, L.; Jin, Z. Characteristics, sources, water quality and health risk assessment of trace elements in river water and well water in the Chinese Loess Plateau. *Sci. Total Environ.* **2019**, *650*, 2004-2012, doi:<https://doi.org/10.1016/j.scitotenv.2018.09.322>.
3. Liang, B.; Han, G.; Liu, M.; Yang, K.; Li, X.; Liu, J. Distribution, Sources, and Water Quality Assessment of Dissolved Heavy Metals in the Jiulongjiang River Water, Southeast China. *Int. J. Environ. Res. Public Health* **2018**, *15*, doi:10.3390/ijerph15122752.
4. Liu, X.; Song, Q.; Tang, Y.; Li, W.; Xu, J.; Wu, J.; Wang, F.; Brookes, P.C. Human health risk assessment of heavy metals in soil-vegetable system: A multi-medium analysis. *Sci. Total Environ.* **2013**, *463-464*, 530-540, doi:10.1016/j.scitotenv.2013.06.064.
